# Supplementary material for: Therapeutic target and molecular mechanism of vitamin C-treated pneumonia: a systematic study of network pharmacology
Source: Royal Society of Chemistry journal article supplement (doi:10.1039/d0fo00421a), 2020-01-01
Supplement: d0fo00421a2.xlsx [file d0fo00421a2.xlsx]

## Sheet: Sheet1
Pneumonia and Vitamin C 90 intersection symbols
BBOX1
CYP2D6
PRKCB
CYP2C19
ELANE
PDCD4
PPP3CA
MAOA
DRD3
CHRM1
DBH
NFE2L2
HRH2
FYN
CASP1
CA9
PTGS2
CYP2C9
ESR1
PDE4D
PLOD2
GSK3B
MMP1
PTPRC
CCR4
HMGCR
MC4R
FLT1
DUSP3
CXCR1
GSTM1
MAPK1
EGFR
ERBB2
P3H2
ADORA3
DRD4
TERT
PGR
MC3R
ACP1
ADRB3
CHRM3
HTR2A
TMLHE
ESR2
AGTR2
SLC6A3
DRD1
PLOD1
SLC6A4
KDM5C
HTR2C
ADORA2A
KCNH2
CXCR2
PPARG
PRKCD
ABCB1
CNR1
CYP2A6
MAPK14
LCK
CCR2
DRD2
P4HTM
STAT3
CYP2E1
ADRB2
ACHE
VDR
CYP1A2
CTSG
ADORA1
HTR6
MAPK3
MC5R
CHRM2
PTAFR
CCR5
PTGS1
LMNA
CA1
JUN
AR
PRKCA
CYP3A4
VAV1
GRIA2
MMP9
