# Supplementary figures and images for: Therapeutic target and molecular mechanism of vitamin C-treated pneumonia: a systematic study of network pharmacology
Source: Royal Society of Chemistry journal article supplement (doi:10.1039/d0fo00421a), 2020-01-01

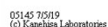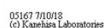

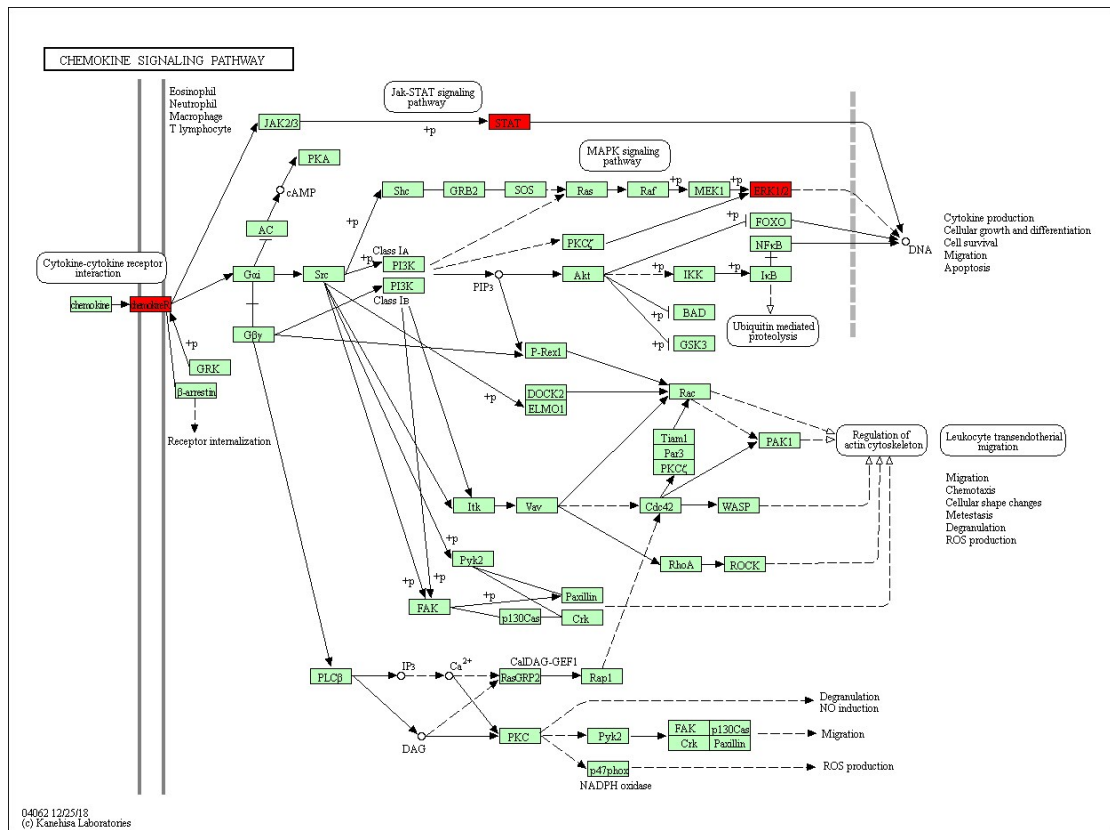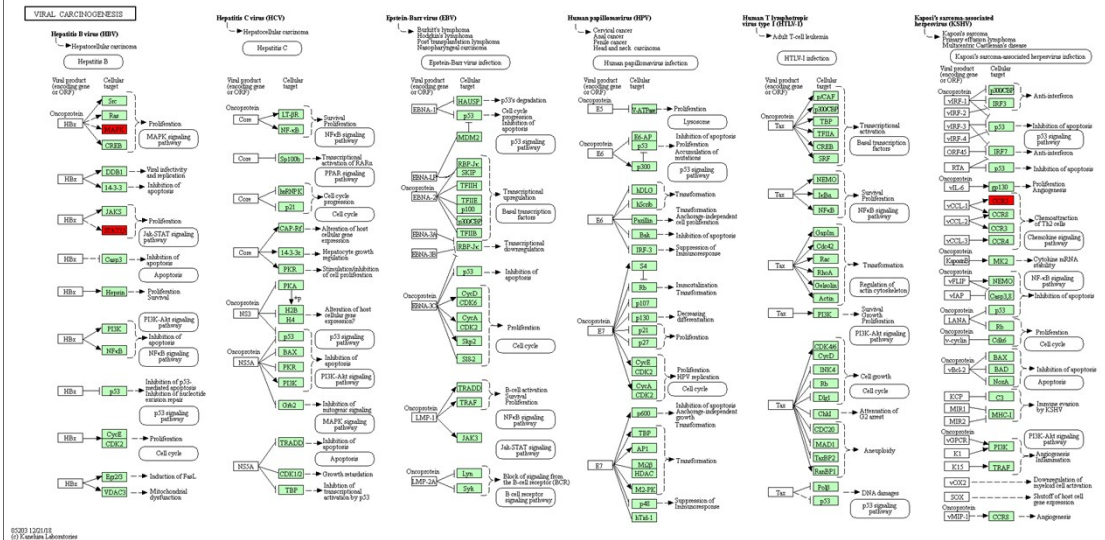

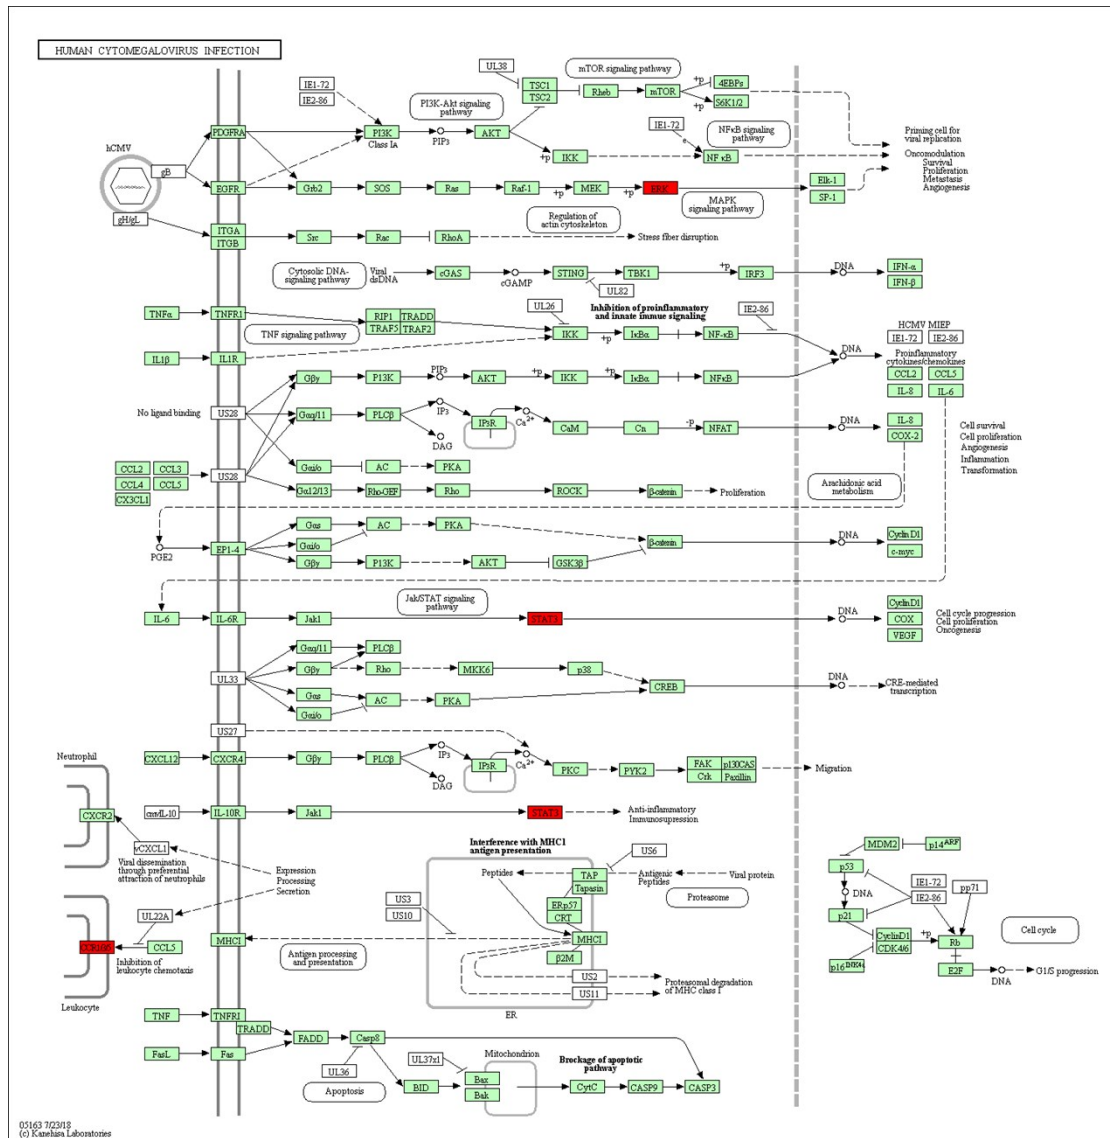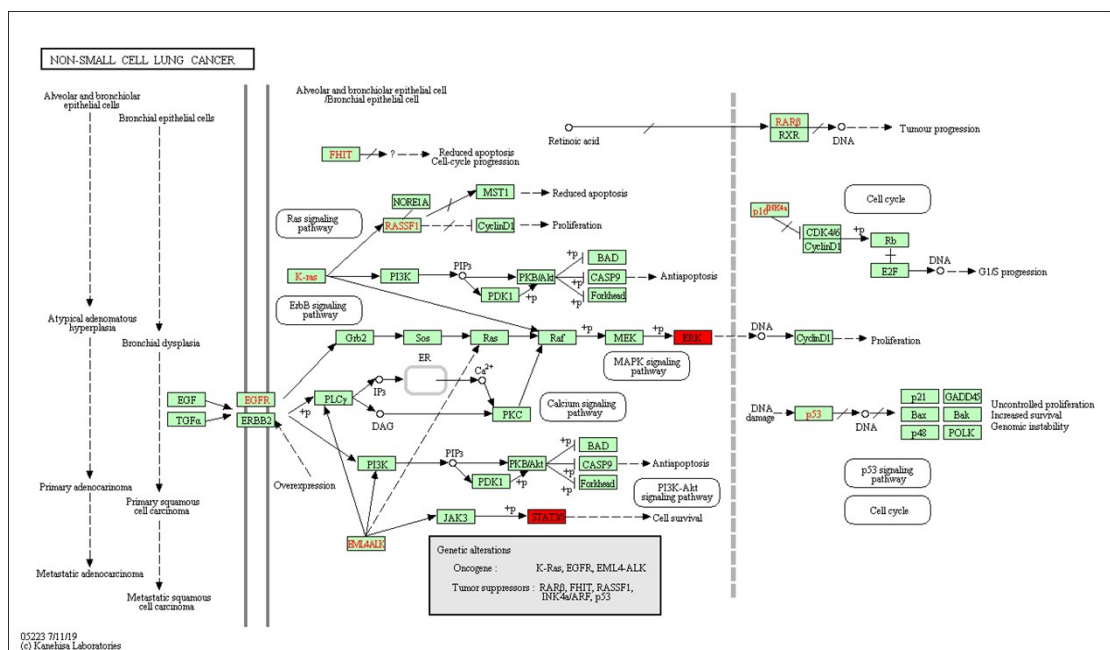

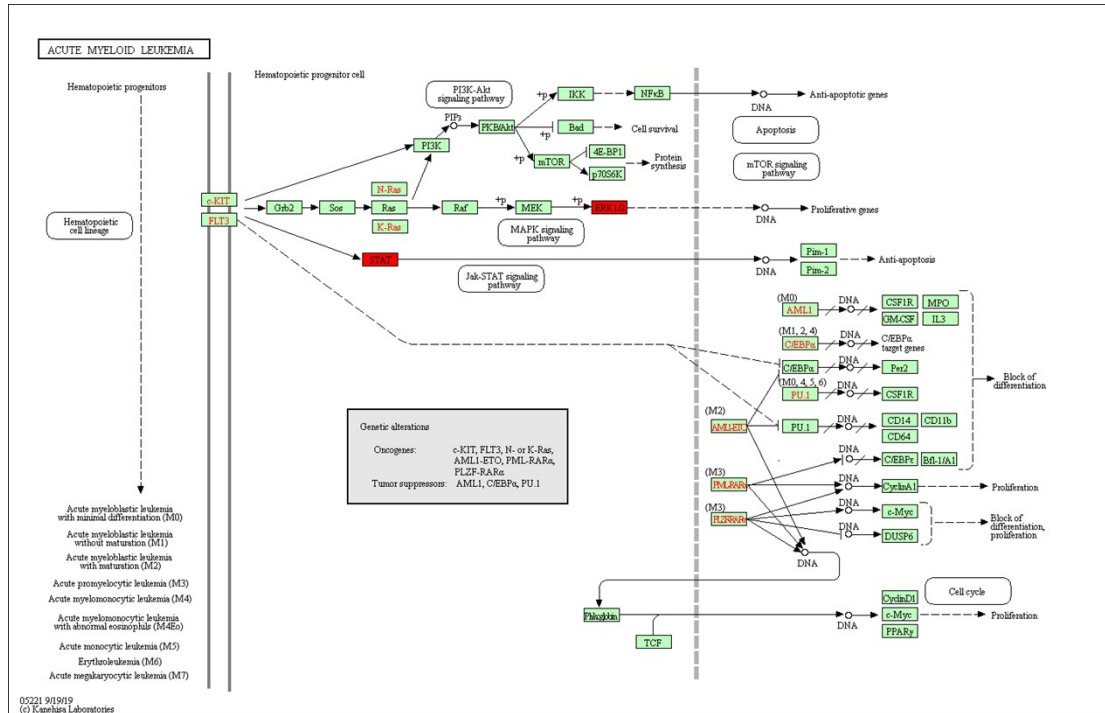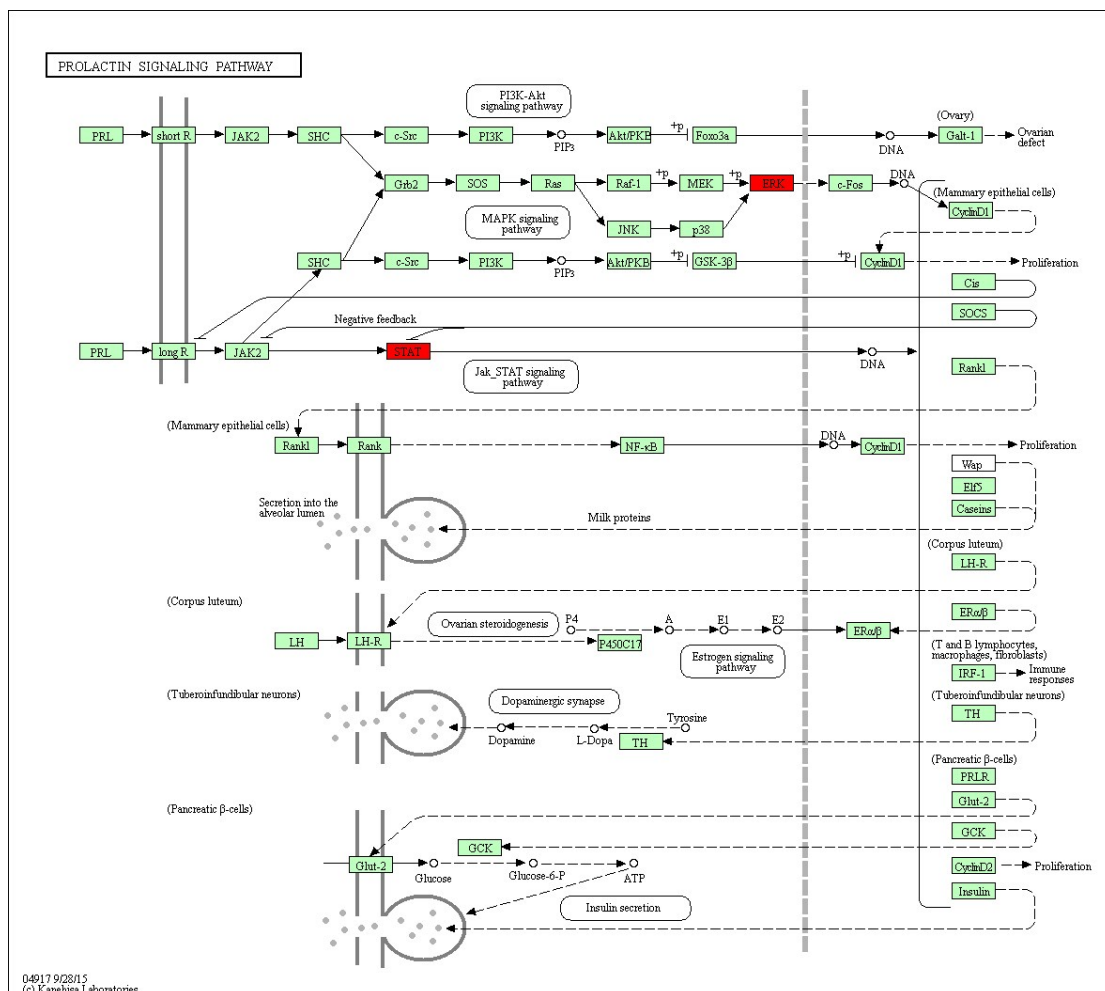

Supplement: d0fo00421a1.pdf [file d0fo00421a1.pdf]
